# Supplementary material for: Interfacing human induced pluripotent stem cell-derived neurons with designed nanowire arrays as a future platform for medical applications
Source: Royal Society of Chemistry journal article supplement (doi:10.1039/d0bm00182a), 2020-01-01
Supplement: d0bm00182a1.pdf [file d0bm00182a1.pdf]

## SUPPORTING INFORMATION

### Interfacing human induced pluripotent stem cell-derived neurons with designed nanowire arrays as a future platform for medical applications

Jann Harberts, Undine Haferkamp, Stefanie Haugg, Cornelius Fendler, Dennis Lam, Robert Zierold, Ole Pless, and Robert H. Blick

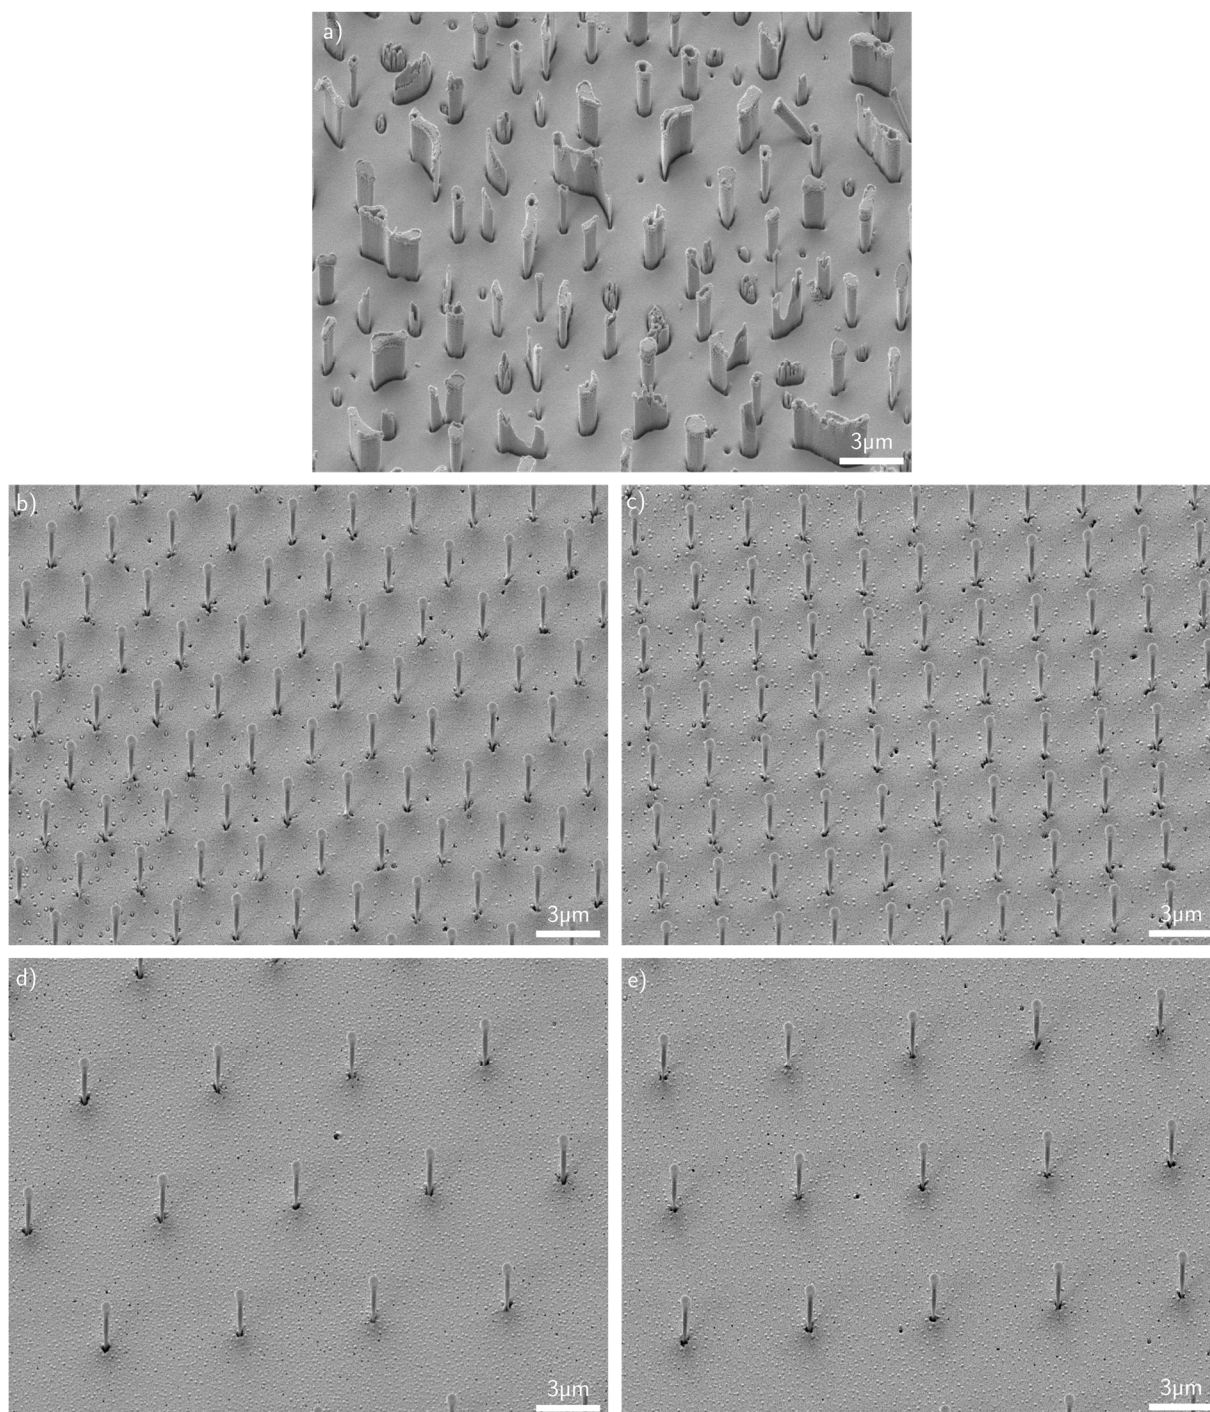

Figure S1: Sample overviews of the NW substrates. a) Random HD NWs. b) Hexagonal HD NWs. c) Rectangular HD NWs. d) Hexagonal LD NWs. e) Rectangular LD NWs.

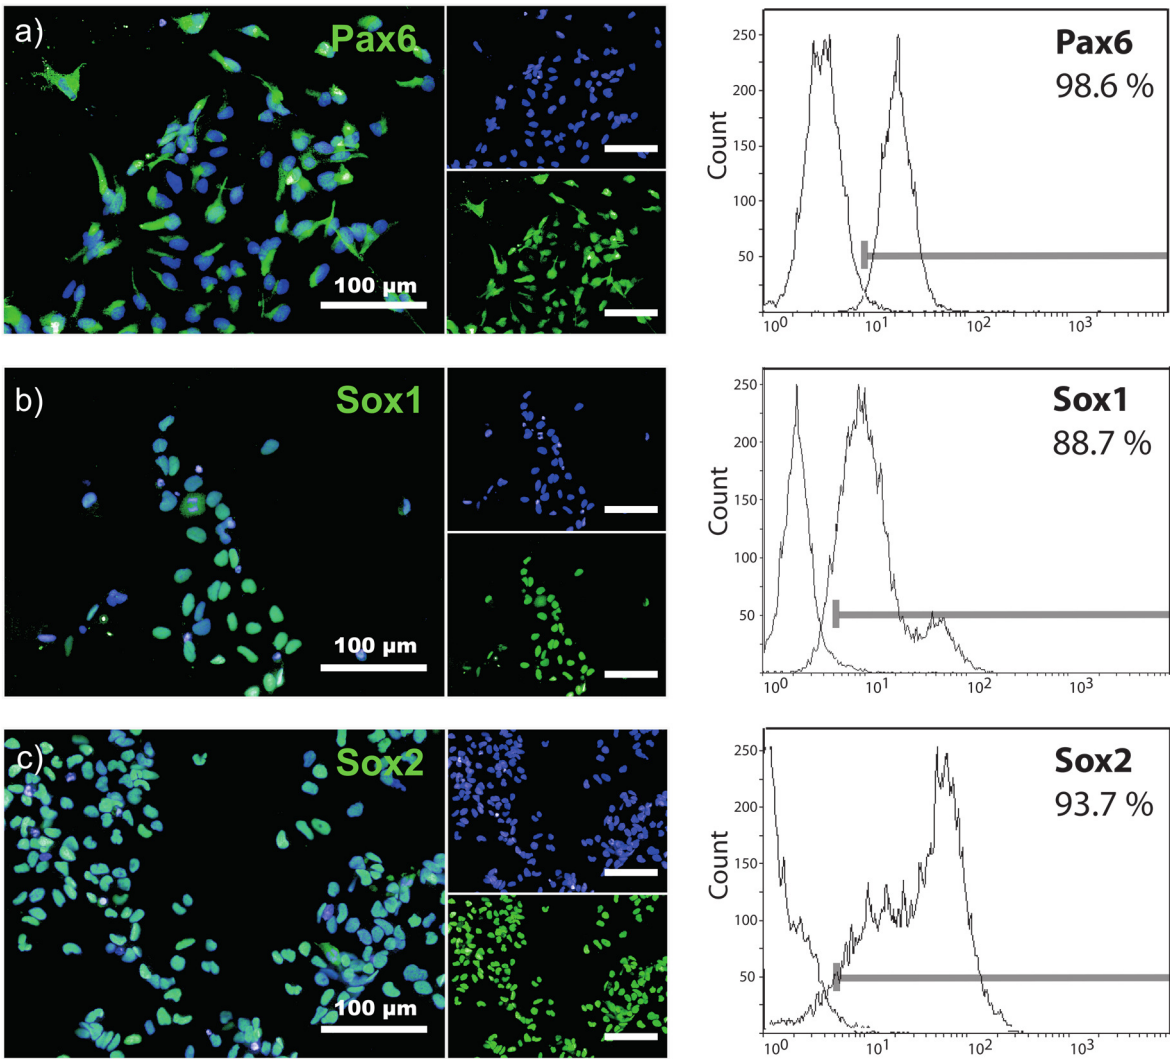

Figure S2: Characterization of human iPSC-derived neural precursor cells (iNPCs). a-c) Immunofluorescence staining and flow cytometry analysis of characteristic NPC marker proteins Pax6, Sox1 and Sox2.

| Array       | Type    | Array       | Type    | MeanDiff | SEM     | q Value | Prob    | Alpha | Sig | LCL       | UCL      |
|-------------|---------|-------------|---------|----------|---------|---------|---------|-------|-----|-----------|----------|
| Control     | (AI2O3) | Control     | (Glass) | -7.74477 | 7.18033 | 1.52538 | 0.92816 | 0.001 | 0   | -42.98691 | 27.49737 |
| Random      | (HD)    | Control     | (Glass) | -8.22342 | 6.55472 | 1.77424 | 0.865   | 0.001 | 0   | -40.39495 | 23.9481  |
| Random      | (HD)    | Control     | (AI2O3) | -0.47865 | 6.55472 | 0.10327 | 1       | 0.001 | 0   | -32.65018 | 31.69287 |
| Hexagonal   | (HD)    | Control     | (Glass) | -7.36123 | 7.18033 | 1.44984 | 0.94272 | 0.001 | 0   | -42.60337 | 27.88091 |
| Hexagonal   | (HD)    | Control     | (AI2O3) | 0.38354  | 7.18033 | 0.07554 | 1       | 0.001 | 0   | -34.8586  | 35.62568 |
| Hexagonal   | (HD)    | Random      | (HD)    | 0.86219  | 6.55472 | 0.18602 | 1       | 0.001 | 0   | -31.30933 | 33.03372 |
| Rectangular | (HD)    | Control     | (Glass) | -2.18024 | 7.18033 | 0.42941 | 0.99992 | 0.001 | 0   | -37.42238 | 33.0619  |
| Rectangular | (HD)    | Control     | (AI2O3) | 5.56453  | 7.18033 | 1.09597 | 0.98521 | 0.001 | 0   | -29.67761 | 40.80667 |
| Rectangular | (HD)    | Random      | (HD)    | 6.04318  | 6.55472 | 1.30385 | 0.96506 | 0.001 | 0   | -26.12834 | 38.21471 |
| Rectangular | (HD)    | Hexagonal   | (HD)    | 5.18099  | 7.18033 | 1.02043 | 0.98977 | 0.001 | 0   | -30.06115 | 40.42313 |
| Hexagonal   | (LD)    | Control     | (Glass) | -0.20669 | 7.18033 | 0.04071 | 1       | 0.001 | 0   | -35.44883 | 35.03545 |
| Hexagonal   | (LD)    | Control     | (AI2O3) | 7.53808  | 7.18033 | 1.48467 | 0.93627 | 0.001 | 0   | -27.70406 | 42.78022 |
| Hexagonal   | (LD)    | Random      | (HD)    | 8.01674  | 6.55472 | 1.72965 | 0.87801 | 0.001 | 0   | -24.15479 | 40.18826 |
| Hexagonal   | (LD)    | Hexagonal   | (HD)    | 7.15454  | 7.18033 | 1.40913 | 0.9497  | 0.001 | 0   | -28.0876  | 42.39668 |
| Hexagonal   | (LD)    | Rectangular | (HD)    | 1.97355  | 7.18033 | 0.3887  | 0.99996 | 0.001 | 0   | -33.26859 | 37.21569 |
| Rectangular | (LD)    | Control     | (Glass) | -6.87914 | 7.18033 | 1.35489 | 0.95809 | 0.001 | 0   | -42.12128 | 28.363   |
| Rectangular | (LD)    | Control     | (AI2O3) | 0.86563  | 7.18033 | 0.17049 | 1       | 0.001 | 0   | -34.37651 | 36.10777 |
| Rectangular | (LD)    | Random      | (HD)    | 1.34428  | 6.55472 | 0.29004 | 0.99999 | 0.001 | 0   | -30.82725 | 33.51581 |
| Rectangular | (LD)    | Hexagonal   | (HD)    | 0.48209  | 7.18033 | 0.09495 | 1       | 0.001 | 0   | -34.76005 | 35.72423 |
| Rectangular | (LD)    | Rectangular | (HD)    | -4.6989  | 7.18033 | 0.92548 | 0.99389 | 0.001 | 0   | -39.94104 | 30.54324 |
| Rectangular | (LD)    | Hexagonal   | (LD)    | -6.67246 | 7.18033 | 1.31418 | 0.96371 | 0.001 | 0   | -41.9146  | 28.56969 |

Figure S3: ANOVA with post hoc Turkey's test of cell viability, alpha = 0.001.



Figure S4: ANOVA with post hoc Turkey's test of electrophysiological parameters, alpha = 0.001.

| Array       | Type    | Array       | Type    | MeanDiff  | SEM     | q Value | Prob    | Alpha | Sig | LCL       | UCL      |
|-------------|---------|-------------|---------|-----------|---------|---------|---------|-------|-----|-----------|----------|
| AP height   |         |             |         |           |         |         |         |       |     |           |          |
| Control     | (Glass) | Control     | (Al2O3) | -6.89821  | 8.06616 | 1.20944 | 0.97726 | 0.001 | 0   | -42.88118 | 29.08475 |
| Random      | (HD)    | Control     | (Al2O3) | 3.95893   | 8.06616 | 0.69411 | 0.99886 | 0.001 | 0   | -32.02404 | 39.9419  |
| Random      | (HD)    | Control     | (Glass) | 10.85714  | 8.3307  | 1.8431  | 0.84683 | 0.001 | 0   | -26.30591 | 48.02019 |
| Hexagonal   | (HD)    | Control     | (Al2O3) | 5.85893   | 8.06616 | 1.02723 | 0.99019 | 0.001 | 0   | -30.12404 | 41.8419  |
| Hexagonal   | (HD)    | Control     | (Glass) | 12.75714  | 8.3307  | 2.16564 | 0.72482 | 0.001 | 0   | -24.40591 | 49.92019 |
| Hexagonal   | (HD)    | Random      | (HD)    | 1.9       | 8.3307  | 0.32254 | 0.99999 | 0.001 | 0   | -35.26305 | 39.06305 |
| Rectangular | (HD)    | Control     | (Al2O3) | -0.2125   | 8.41703 | 0.0357  | 1       | 0.001 | 0   | -37.76067 | 37.33567 |
| Rectangular | (HD)    | Control     | (Glass) | 6.68571   | 8.67087 | 1.09044 | 0.9866  | 0.001 | 0   | -31.99481 | 45.36624 |
| Rectangular | (HD)    | Random      | (HD)    | -4.17143  | 8.67087 | 0.68036 | 0.99898 | 0.001 | 0   | -42.85196 | 34.5091  |
| Rectangular | (HD)    | Hexagonal   | (HD)    | -6.07143  | 8.67087 | 0.99025 | 0.99192 | 0.001 | 0   | -44.75196 | 32.6091  |
| Hexagonal   | (LD)    | Control     | (Al2O3) | 14.05     | 7.79266 | 2.5498  | 0.55305 | 0.001 | 0   | -20.71285 | 48.81285 |
| Hexagonal   | (LD)    | Control     | (Glass) | 20.94821  | 8.06616 | 3.67278 | 0.15122 | 0.001 | 0   | -15.03475 | 56.93118 |
| Hexagonal   | (LD)    | Random      | (HD)    | 10.09107  | 8.06616 | 1.76923 | 0.86993 | 0.001 | 0   | -25.8919  | 46.07404 |
| Hexagonal   | (LD)    | Hexagonal   | (HD)    | 8.19107   | 8.06616 | 1.43611 | 0.94776 | 0.001 | 0   | -27.7919  | 44.17404 |
| Hexagonal   | (LD)    | Rectangular | (HD)    | 14.2625   | 8.41703 | 2.39636 | 0.62311 | 0.001 | 0   | -23.28567 | 51.81067 |
| Rectangular | (LD)    | Control     | (Al2O3) | -4.45694  | 7.5731  | 0.8323  | 0.99685 | 0.001 | 0   | -38.24036 | 29.32647 |
| Rectangular | (LD)    | Control     | (Glass) | 2.44127   | 7.85426 | 0.43957 | 0.99992 | 0.001 | 0   | -32.59639 | 37.47893 |
| Rectangular | (LD)    | Random      | (HD)    | -8.41587  | 7.85426 | 1.51534 | 0.93318 | 0.001 | 0   | -43.45353 | 26.62179 |
| Rectangular | (LD)    | Hexagonal   | (HD)    | -10.31587 | 7.85426 | 1.85744 | 0.84212 | 0.001 | 0   | -45.35353 | 24.72179 |
| Rectangular | (LD)    | Rectangular | (HD)    | -4.24444  | 8.21418 | 0.73075 | 0.99848 | 0.001 | 0   | -40.88771 | 32.39882 |
| Rectangular | (LD)    | Hexagonal   | (LD)    | -18.50694 | 7.5731  | 3.45602 | 0.20485 | 0.001 | 0   | -52.29036 | 15.27647 |
| RMP         |         |             |         |           |         |         |         |       |     |           |          |
| Control     | (Glass) | Control     | (Al2O3) | 5.20714   | 3.93721 | 1.87036 | 0.8378  | 0.001 | 0   | -12.35664 | 22.77092 |
| Random      | (HD)    | Control     | (Al2O3) | 2.49286   | 3.93721 | 0.89541 | 0.9953  | 0.001 | 0   | -15.07092 | 20.05664 |
| Random      | (HD)    | Control     | (Glass) | -2.71429  | 4.06633 | 0.94399 | 0.99375 | 0.001 | 0   | -20.85408 | 15.42551 |
| Hexagonal   | (HD)    | Control     | (Al2O3) | 6.62143   | 3.93721 | 2.37837 | 0.63127 | 0.001 | 0   | -10.94235 | 24.18521 |
| Hexagonal   | (HD)    | Control     | (Glass) | 1.41429   | 4.06633 | 0.49187 | 0.99984 | 0.001 | 0   | -16.72551 | 19.55408 |
| Hexagonal   | (HD)    | Random      | (HD)    | 4.12857   | 4.06633 | 1.43586 | 0.94781 | 0.001 | 0   | -14.01122 | 22.26837 |
| Rectangular | (HD)    | Control     | (Al2O3) | 7.35      | 4.10847 | 2.53001 | 0.56209 | 0.001 | 0   | -10.97778 | 25.67778 |
| Rectangular | (HD)    | Control     | (Glass) | 2.14286   | 4.23237 | 0.71602 | 0.99864 | 0.001 | 0   | -16.73764 | 21.02336 |
| Rectangular | (HD)    | Random      | (HD)    | 4.85714   | 4.23237 | 1.62298 | 0.90947 | 0.001 | 0   | -14.02336 | 23.73764 |
| Rectangular | (HD)    | Hexagonal   | (HD)    | 0.72857   | 4.23237 | 0.24345 | 1       | 0.001 | 0   | -18.15193 | 19.60907 |
| Hexagonal   | (LD)    | Control     | (Al2O3) | -3.8875   | 3.8037  | 1.44537 | 0.94618 | 0.001 | 0   | -20.85573 | 13.08073 |
| Hexagonal   | (LD)    | Control     | (Glass) | -9.09464  | 3.93721 | 3.26672 | 0.2619  | 0.001 | 0   | -26.65842 | 8.46914  |
| Hexagonal   | (LD)    | Random      | (HD)    | -6.38036  | 3.93721 | 2.29177 | 0.67012 | 0.001 | 0   | -23.94414 | 11.18342 |
| Hexagonal   | (LD)    | Hexagonal   | (HD)    | -10.50893 | 3.93721 | 3.77472 | 0.13009 | 0.001 | 0   | -28.07271 | 7.05485  |
| Hexagonal   | (LD)    | Rectangular | (HD)    | -11.2375  | 4.10847 | 3.86816 | 0.11286 | 0.001 | 0   | -29.56528 | 7.09028  |
| Rectangular | (LD)    | Control     | (Al2O3) | 3.45      | 3.69653 | 1.31989 | 0.96501 | 0.001 | 0   | -13.04015 | 19.94015 |
| Rectangular | (LD)    | Control     | (Glass) | -1.75714  | 3.83377 | 0.64818 | 0.99923 | 0.001 | 0   | -18.85951 | 15.34522 |
| Rectangular | (LD)    | Random      | (HD)    | 0.95714   | 3.83377 | 0.35307 | 0.99998 | 0.001 | 0   | -16.14522 | 18.05951 |
| Rectangular | (LD)    | Hexagonal   | (HD)    | -3.17143  | 3.83377 | 1.16989 | 0.98077 | 0.001 | 0   | -20.27379 | 13.93093 |
| Rectangular | (LD)    | Rectangular | (HD)    | -3.9      | 4.00945 | 1.37561 | 0.95734 | 0.001 | 0   | -21.78608 | 13.98608 |
| Rectangular | (LD)    | Hexagonal   | (LD)    | 7.3375    | 3.69653 | 2.80717 | 0.43801 | 0.001 | 0   | -9.15265  | 23.82765 |
| MC          |         |             |         |           |         |         |         |       |     |           |          |
| Control     | (Glass) | Control     | (Al2O3) | -3.04107  | 4.37508 | 0.98301 | 0.99223 | 0.001 | 0   | -22.55818 | 16.47604 |
| Random      | (HD)    | Control     | (Al2O3) | -2.12679  | 4.37508 | 0.68747 | 0.99892 | 0.001 | 0   | -21.64389 | 17.39032 |
| Random      | (HD)    | Control     | (Glass) | 0.91429   | 4.51856 | 0.28615 | 0.99999 | 0.001 | 0   | -19.2429  | 21.07147 |
| Hexagonal   | (HD)    | Control     | (Al2O3) | 1.13036   | 4.37508 | 0.36538 | 0.99997 | 0.001 | 0   | -18.38675 | 20.64747 |
| Hexagonal   | (HD)    | Control     | (Glass) | 4.17143   | 4.51856 | 1.30557 | 0.96682 | 0.001 | 0   | -15.98575 | 24.32861 |
| Hexagonal   | (HD)    | Random      | (HD)    | 3.25714   | 4.51856 | 1.01942 | 0.99058 | 0.001 | 0   | -16.90004 | 23.41433 |
| Rectangular | (HD)    | Control     | (Al2O3) | 0.9375    | 4.56538 | 0.29041 | 0.99999 | 0.001 | 0   | -19.42857 | 21.30357 |
| Rectangular | (HD)    | Control     | (Glass) | 3.97857   | 4.70307 | 1.19636 | 0.97847 | 0.001 | 0   | -17.00169 | 24.95883 |
| Rectangular | (HD)    | Random      | (HD)    | 3.06429   | 4.70307 | 0.92143 | 0.99451 | 0.001 | 0   | -17.91598 | 24.04455 |
| Rectangular | (HD)    | Hexagonal   | (HD)    | -0.19286  | 4.70307 | 0.05799 | 1       | 0.001 | 0   | -21.17312 | 20.7874  |
| Hexagonal   | (LD)    | Control     | (Al2O3) | -2.575    | 4.22672 | 0.86157 | 0.99619 | 0.001 | 0   | -21.43032 | 16.28032 |
| Hexagonal   | (LD)    | Control     | (Glass) | 0.46607   | 4.37508 | 0.15065 | 1       | 0.001 | 0   | -19.05104 | 19.98318 |
| Hexagonal   | (LD)    | Random      | (HD)    | -0.44821  | 4.37508 | 0.14488 | 1       | 0.001 | 0   | -19.96532 | 19.06889 |
| Hexagonal   | (LD)    | Hexagonal   | (HD)    | -3.70536  | 4.37508 | 1.19773 | 0.97835 | 0.001 | 0   | -23.22247 | 15.81175 |
| Hexagonal   | (LD)    | Rectangular | (HD)    | -3.5125   | 4.56538 | 1.08806 | 0.98675 | 0.001 | 0   | -23.87857 | 16.85357 |
| Rectangular | (LD)    | Control     | (Al2O3) | 2.86639   | 4.10764 | 0.98687 | 0.99207 | 0.001 | 0   | -15.45769 | 21.19046 |
| Rectangular | (LD)    | Control     | (Glass) | 5.90746   | 4.26014 | 1.96107 | 0.80589 | 0.001 | 0   | -13.09691 | 24.91184 |
| Rectangular | (LD)    | Random      | (HD)    | 4.99317   | 4.26014 | 1.65756 | 0.90088 | 0.001 | 0   | -14.0112  | 23.99755 |
| Rectangular | (LD)    | Hexagonal   | (HD)    | 1.73603   | 4.26014 | 0.5763  | 0.99961 | 0.001 | 0   | -17.28834 | 20.74041 |
| Rectangular | (LD)    | Rectangular | (HD)    | 1.92889   | 4.45536 | 0.61227 | 0.99944 | 0.001 | 0   | -17.94636 | 21.80414 |
| Rectangular | (LD)    | Hexagonal   | (LD)    | 5.44139   | 4.10764 | 1.87341 | 0.83678 | 0.001 | 0   | -12.88269 | 23.76546 |
| IR          |         |             |         |           |         |         |         |       |     |           |          |
| Control     | (Glass) | Control     | (Al2O3) | 0.8875    | 0.36622 | 3.4272  | 0.21291 | 0.001 | 0   | -0.74621  | 2.52121  |
| Random      | (HD)    | Control     | (Al2O3) | 0.37321   | 0.36622 | 1.44122 | 0.9469  | 0.001 | 0   | -1.26049  | 2.00692  |
| Random      | (HD)    | Control     | (Glass) | -0.51429  | 0.37823 | 1.92292 | 0.81965 | 0.001 | 0   | -2.20157  | 1.173    |
| Hexagonal   | (HD)    | Control     | (Al2O3) | 0.07321   | 0.36622 | 0.28273 | 0.99999 | 0.001 | 0   | -1.56049  | 1.70692  |
| Hexagonal   | (HD)    | Control     | (Glass) | -0.81429  | 0.37823 | 3.04462 | 0.3409  | 0.001 | 0   | -2.50157  | 0.873    |
| Hexagonal   | (HD)    | Random      | (HD)    | -0.3      | 0.37823 | 1.1217  | 0.98449 | 0.001 | 0   | -1.98728  | 1.38728  |
| Rectangular | (HD)    | Control     | (Al2O3) | 0.50417   | 0.38215 | 1.86575 | 0.83935 | 0.001 | 0   | -1.2006   | 2.20894  |
| Rectangular | (HD)    | Control     | (Glass) | -0.38333  | 0.39368 | 1.37706 | 0.95712 | 0.001 | 0   | -2.13951  | 3.37285  |
| Rectangular | (HD)    | Random      | (HD)    | 0.13095   | 0.39368 | 0.47042 | 0.99988 | 0.001 | 0   | -1.62523  | 1.88713  |
| Rectangular | (HD)    | Hexagonal   | (HD)    | 0.43095   | 0.39368 | 1.54812 | 0.92644 | 0.001 | 0   | -1.32523  | 2.18713  |
| Hexagonal   | (LD)    | Control     | (Al2O3) | 1         | 0.3538  | 3.99717 | 0.09218 | 0.001 | 0   | -0.57831  | 2.57831  |
| Hexagonal   | (LD)    | Control     | (Glass) | 0.1125    | 0.36622 | 0.43443 | 0.99992 | 0.001 | 0   | -1.52121  | 1.74621  |
| Hexagonal   | (LD)    | Random      | (HD)    | 0.62679   | 0.36622 | 2.42042 | 0.61217 | 0.001 | 0   | -1.00692  | 2.26049  |
| Hexagonal   | (LD)    | Hexagonal   | (HD)    | 0.92679   | 0.36622 | 3.57891 | 0.17295 | 0.001 | 0   | -0.70692  | 2.56049  |
| Hexagonal   | (LD)    | Rectangular | (HD)    | 0.49583   | 0.38215 | 1.83491 | 0.8495  | 0.001 | 0   | -1.20894  | 2.2006   |
| Rectangular | (LD)    | Control     | (Al2O3) | 0.39861   | 0.34384 | 1.63951 | 0.90542 | 0.001 | 0   | -1.13523  | 1.93245  |
| Rectangular | (LD)    | Control     | (Glass) | -0.48889  | 0.3566  | 1.93885 | 0.81396 | 0.001 | 0   | -2.07968  | 1.1019   |
| Rectangular | (LD)    | Random      | (HD)    | 0.0254    | 0.3566  | 0.10072 | 1       | 0.001 | 0   | -1.56539  | 1.61618  |
| Rectangular | (LD)    | Hexagonal   | (HD)    | 0.3254    | 0.3566  | 1.29047 | 0.96865 | 0.001 | 0   | -1.26539  | 1.91618  |
| Rectangular | (LD)    | Rectangular | (HD)    | -0.10556  | 0.37294 | 0.40027 | 0.99995 | 0.001 | 0   | -1.76924  | 1.55813  |
| Rectangular | (LD)    | Hexagonal   | (LD)    | -0.60139  | 0.34384 | 2.47355 | 0.58792 | 0.001 | 0   | -2.13523  | 0.93245  |
| MTC         |         |             |         |           |         |         |         |       |     |           |          |
| Control     | (Glass) | Control     | (Al2O3) | 3.69286   | 6.90864 | 0.75594 | 0.99816 | 0.001 | 0   | -27.12641 | 34.51212 |
| Random      | (HD)    | Control     | (Al2O3) | -2.36429  | 6.90864 | 0.48397 | 0.99986 | 0.001 | 0   | -33.18355 | 28.45498 |
| Random      | (HD)    | Control     | (Glass) | -6.05714  | 7.13521 | 1.20054 | 0.97809 | 0.001 | 0   | -37.88715 | 25.77286 |
| Hexagonal   | (HD)    | Control     | (Al2O3) | 2.69286   | 6.90864 | 0.55123 | 0.99969 | 0.001 | 0   | -28.12641 | 33.51212 |
| Hexagonal   | (HD)    | Control     | (Glass) | -1        | 7.13521 | 0.1982  | 1       | 0.001 | 0   | -32.83    | 30.83    |
| Hexagonal   | (HD)    | Random      | (HD)    | 5.05714   | 7.13521 | 1.00234 | 0.99139 | 0.001 | 0   | -26.77286 | 36.38715 |
| Rectangular | (HD)    | Control     | (Al2O3) | -0.91667  | 7.20915 | 0.17982 | 1       | 0.001 | 0   | -33.07652 | 31.25319 |
| Rectangular | (HD)    | Control     | (Glass) | -4.60952  | 7.42656 | 0.87778 | 0.99579 | 0.001 | 0   | -37.73924 | 28.52019 |
| Rectangular | (HD)    | Random      | (HD)    | 1.44762   | 7.42656 | 0.27566 | 0.99999 | 0.001 | 0   | -31.6821  | 34.57734 |
| Rectangular | (HD)    | Hexagonal   | (HD)    | -3.60952  | 7.42656 | 0.68735 | 0.99892 | 0.001 | 0   | -36.73924 | 29.52019 |
| Hexagonal   | (LD)    | Control     | (Al2O3) | 11.05     | 6.67438 | 2.34135 | 0.64798 | 0.001 | 0   | -18.72424 | 40.82424 |
| Hexagonal   | (LD)    | Control     | (Glass) | 7.35714   | 6.90864 | 1.50602 | 0.93502 | 0.001 | 0   | -23.46212 | 38.17641 |
| Hexagonal   | (LD)    | Random      | (HD)    | 13.41429  | 6.90864 | 2.74593 | 0.46472 | 0.001 | 0   | -17.40498 | 44.23355 |
| Hexagonal   | (LD)    | Hexagonal   | (HD)    | 8.35714   | 6.90864 | 1.71073 | 0.88676 | 0.001 | 0   | -22.46212 | 39.17641 |
| Hexagonal   | (LD)    | Rectangular | (HD)    | 11.96667  | 7.20915 | 2.34749 |         |       |     |           |          |
